# Supplementary material for: Development of volatility distributions for organic matter in biomass burning emissions
Source: Royal Society of Chemistry journal article supplement (doi:10.1039/d2ea00080f), 2022-10-07
Supplement: d2ea00080f1.pdf [file d2ea00080f1.pdf]

1 Supplement to: Development of Volatility Distributions of Biomass Burning Organic  
2 Emissions  
3

4 Aditya Sinha<sup>1</sup>, Ingrid George<sup>2</sup>, Amara Holder<sup>2</sup>, William Preston<sup>3</sup>, Michael Hays<sup>2</sup>, Andrew Grieshop<sup>1</sup>

5 <sup>1</sup>Department of Civil and Environmental Engineering, North Carolina State University, Raleigh, NC

6 <sup>2</sup>Center for Environmental Measurement and Modeling, Environmental Protection Agency, Durham, NC

7 <sup>3</sup>CSS Inc., Durham, NC

8 Data underlying all figures in manuscript and supplement can be freely access at : doi:10.5061/dryad.jsxksn0ct

9 **Section S1: Comparison of aerosol mass in particle phase from partitioned TD/GC/MS and artifact**  
10 **corrected filter measurements**

11

12 To ensure consistency in our measurement approaches, we compare organic aerosol in the particle phase  
13 as measured by collection on quartz filters against organic aerosol observed in TD/GC/MS filter-in-tube  
14 chromatograms, after accounting for partitioning.

15

16 Combustion emissions were sampled onto bare quartz (BQ) filters and analyzed using thermo-optical  
17 methods to quantify organic carbon content. Primary organic carbon (OC) was estimated for positive  
18 artifact due to vapor absorption using a quartz-behind teflon (QBT) filter method.<sup>1</sup> The artifact-corrected  
19 OC is calculated as the difference between the OC concentration on a front quartz filter and the OC  
20 concentration on a parallel quartz filter positioned behind a teflon filter. Note that the QBT filters were  
21 not collected for field samples and so estimates from BQ filters were used directly. The artifact  
22 percentage (QBT/BQ × 100) is less than 1% for burnhut, 17% for RWC-Startup and 14% for RWC-high  
23 fire. The OC concentrations were also background corrected using measurements taken from background  
24 filter samples collected at the test sites. To estimate primary organic aerosol concentrations (POA) we  
25 applied a campaign average estimate of the OM/OC ratio of 1.53 to the calculated OC mass  
26 concentrations. In the second method, we use the volatility distributions derived from TD/GC/MS  
27 chromatograms from filter-in-tube sorbent samples (described in section 2.3) to estimate POA in the  
28 particle phase. For each experiment, we use the partitioning equation (equation 1 in manuscript) at the

29 POA concentration measured by the quartz filter, to calculate the particle fraction ( $X_p$ ) in each volatility  
30 bin for the basis set of saturation concentration: [ $10^{-2}, 10^{-1}, 10^0, 10^1, 10^2, 10^3, 10^4, 10^5, 10^6$ ]  $\mu\text{g m}^{-3}$ . We then  
31 calculate the mass in the particle phase in each bin by using the total organic mass (particle + gas) in a

32 volatility bin as measured by the filter-in-tube chromatograms and the particle fraction,  $X_p$ . Figure S9  
33 shows the particle phase masses summed up and presented as an emission factor.

34

35 Comparing these two methods showed that EFs derived using the filter-in-sorbent tube method were  
36 biased low relative to filter-derived derived POA EFs. The divergence was largest for open field burns  
37 (burn-average correction factor of 10.36 – reflecting an order of magnitude divergence) and smallest for  
38 residential woodstove emissions (test average correction factor of 2.82). Several issues may contribute to  
39 the under-estimation of the TD/GC/MS mass. For example, it is possible that some organic material does  
40 not elute from the chromatogram but is measured on filter samples or perhaps the difference in mass is  
41 due to the uncertainty in response in the TIC analyzed using the *n*-alkane based calibration resulting in the  
42 observed disparity. To reconcile this difference, an averaged correction factor was calculated using the  
43 ratios of POA EFs from the two methods across the replicate samples of each combustion source. The bin  
44 masses estimated from the TD/GC/MS method are then corrected using these factors. To make this  
45 correction we assume that the impact of the divergence between the two methods is evenly distributed  
46 across the volatility bins. This assumption cannot be directly tested and is thus a source of uncertainty.

47 The averaged correction factors applied for each combustion source type are shown in Figure S9.

48

49

50

51 **Table S1:** Operating parameters of the TD/GC/MS system – Gerstel and Cooled Injection System inlet  
52 conditions, GC oven conditions and MS conditions.

53

| Gerstel and CIS inlet conditions    |                                            |
|-------------------------------------|--------------------------------------------|
| Gerstel Temperature (°C) ramp       | 25°C ramped to 300° at 60°C/sec hold 7 min |
| Inlet type                          | PTV                                        |
| CIS cold trapping temperature       | -100°C                                     |
| Mode                                | Solvent Vent                               |
| Carrier gas                         | He                                         |
| Purge flow to split vent (mL/min)   | 50                                         |
| Column                              | 30 m * .25 mm id<br>HP 5 MS UI             |
| Column flow rate (ml/min)           | 1                                          |
| GC oven conditions                  |                                            |
| Initial oven temperature (°C)       | 65                                         |
| Initial oven hold time (min)        | 10                                         |
| Oven temperature ramp rate (°C/min) | 10                                         |
| Final oven temperature (°C)         | 300                                        |
| Final oven hold time (min)          | 26.5                                       |
| Maximum column temperature (°C)     | 325                                        |
| MS conditions                       |                                            |
| solvent delay time (min)            | 5.5                                        |
| GC/MS interface temperature (°C)    | 300                                        |
| data collection mode                | Scan                                       |
| scan range (amu)                    | 50-500                                     |
| MS source temperature (°C)          |                                            |
| MS quad temperature (°C)            | 230                                        |
|                                     | 150                                        |

54

55

57 **Table S2:** Components of calibration compounds spiked on Carbotrap C/ Carbotrap F adsorbent tubes  
 58 along with solvent (HIB solution) and internal standard. Spikes were prepared of 10 ng of each  
 59 component for the sets of standard mixture.

60

61

62

63

| S.No. | Type of Standard   | Components                                                                                                                                                                                                                                   | Molecular Weight (g/mol)                                                                                          |
|-------|--------------------|----------------------------------------------------------------------------------------------------------------------------------------------------------------------------------------------------------------------------------------------|-------------------------------------------------------------------------------------------------------------------|
| 1     | Alkane Standard    | C10 – C38 (all even)                                                                                                                                                                                                                         | 142.3 – 535.0                                                                                                     |
| 2     | PAH Standard       | Acenaphthylene<br>Anthracene<br>Benz[a]anthracene<br>Benzo[b]fluoranthene<br>Benzo[k]fluoranthene<br>Benzo[a]perylene<br>Benzo[a]pyrene<br>Chrysene<br>Dibenz[a,h]anthracene<br>Fluorene<br>Indeno[1,2,3-cd]pyrene<br>Phenanthrene<br>Pyrene | 152.2<br>178.2<br>228.3<br>252.3<br>252.3<br>276.3<br>252.3<br>228.3<br>278.4<br>166.2<br>276.3<br>178.2<br>202.3 |
| 3     | Methoxy Phenol Mix | Syringol<br>Guaiacol<br>o-Cresol<br>m-Cresol<br>p-Cresol<br>Vanillin                                                                                                                                                                         | 154.2<br>124.1<br>108.1<br>108.1<br>108.1<br>152.1                                                                |
| 4     | TCLP Acid Mix      | 2-Methylphenol (o-cresol)<br>3-Methylphenol (m-cresol)<br>4-Methylphenol (p-cresol)<br>Pentachlorophenol<br>2,4,5-Trichlorophenol<br>2,4,6-Trichlorophenol<br>Phenol                                                                         | 108.1<br>108.1<br>108.1<br>266.3<br>197.4<br>197.4<br>94.1                                                        |
|       | Sugar Mix          | Levoglucosan                                                                                                                                                                                                                                 | 162.4                                                                                                             |

A) Open Field Burns

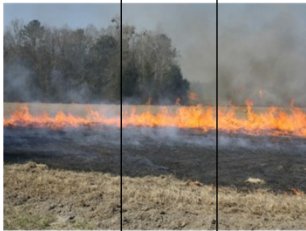

Measurement Package placed downwind burning field

B) Laboratory Open Burn

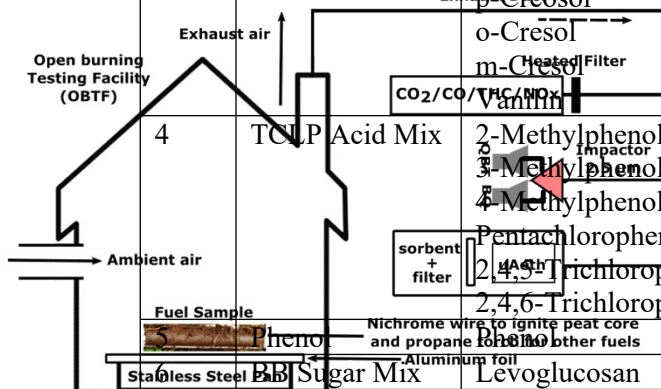

C) Laboratory Woodstove Testing

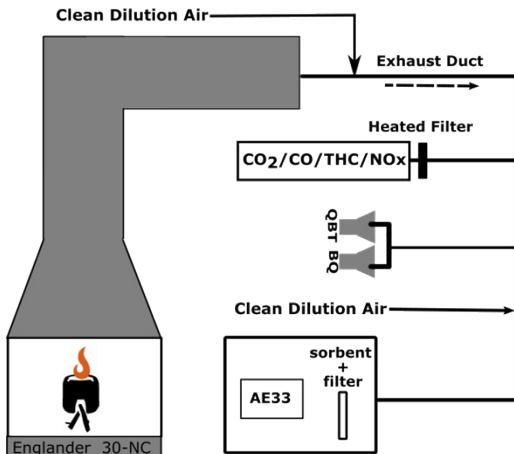

65 **Figure S1: A) Experimental schematic for collection of emissions from open field burning. The**  
 66 **measurement package was placed downstream of the burning field and included gas and particle**  
 67 **phase measurements. B) Experimental schematic for collection of emissions from laboratory**  
 68 **simulated open burning. Testing was carried out in the open burning testing facility (OBTF)<sup>1</sup> C)**  
 69 **Experimental schematic for collection of emissions from laboratory woodstove testing.**  
 70

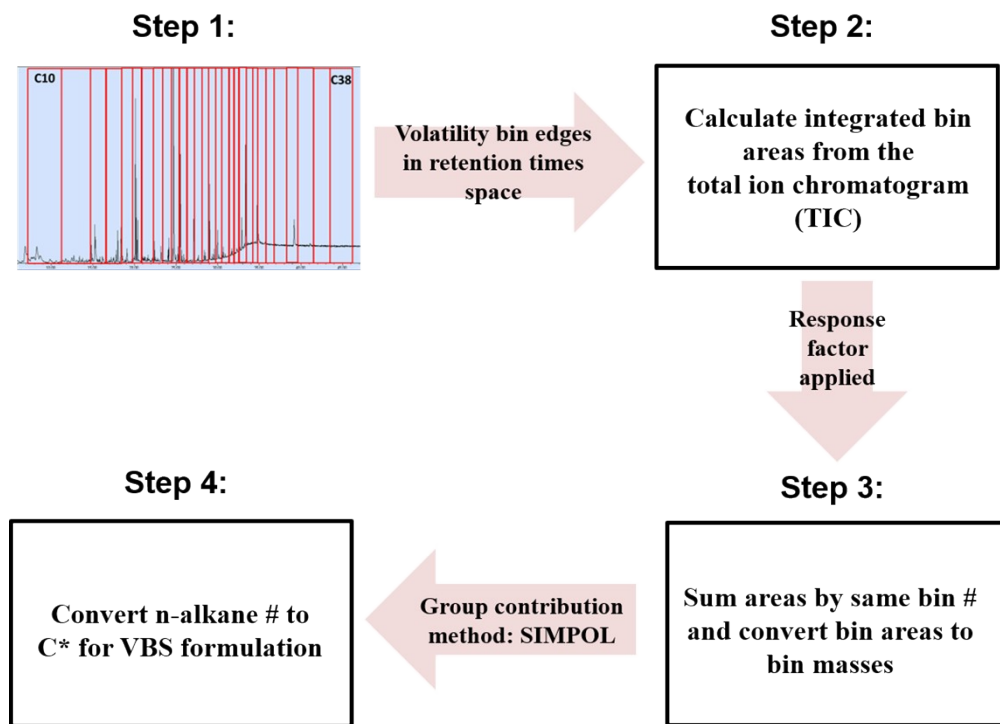

71  
 72 **Figure S2: Flow chart depicting the various steps involved in the transformation of the raw total**  
 73 **ion chromatogram (TIC) to depictions of volatility distribution using the volatility basis set (VBS)**  
 74 **framework.**

75

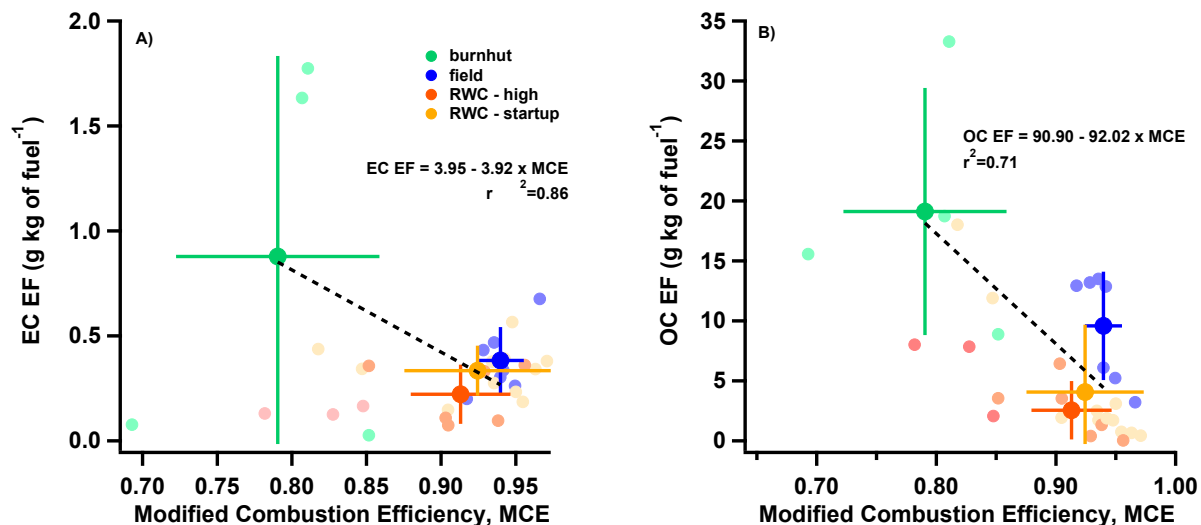

76

77 **Figure S3: A) Elemental carbon emission factors (EC EFs) and B) Organic carbon emission factors**  
 78 **(OC EF) as function of modified combustion efficiency (MCE) for different source emissions –**  
 79 **burnhut, field, RWC phases (delineated by color). Faded markers represent test-averaged**  
 80 **observations from integrated filter measurements while darker markers show the average PM<sub>2.5</sub> EF**  
 81 **and MCE from a source emissions type with the error bars denoting the standard deviation across**  
 82 **individual tests.**

83

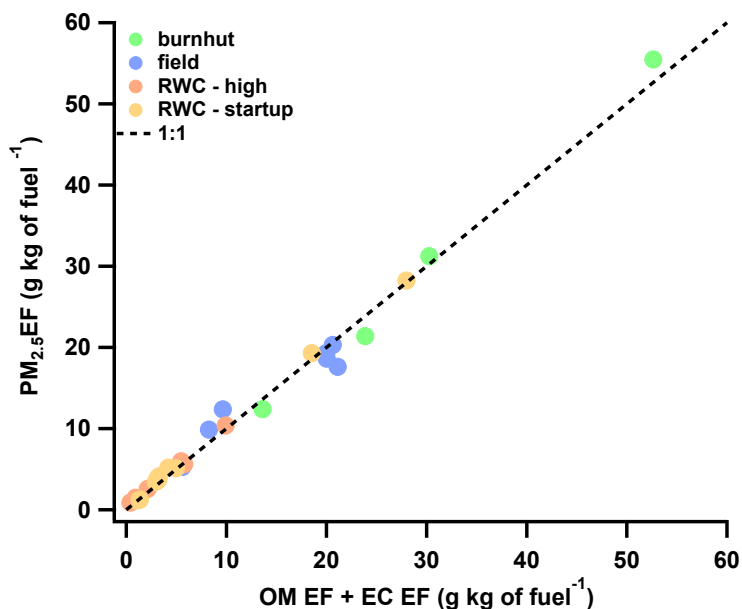

84

85 **Figure S4: PM<sub>2.5</sub> emission factors, PM<sub>2.5</sub> EF (from gravimetric filter measurements) plotted against**  
 86 **OM EF + EC EF (thermo-optical filter measurements). OC EFs are converted to OM EFs using an**  
 87 **OM/OC ratio of 1.53, the average for all samples calculated assuming OM + EC = PM<sub>2.5</sub> in all cases**  
 88 **(a simplification). Combustion sources are delineated by color. The dashed black line shows the 1:1**  
 89 **line**

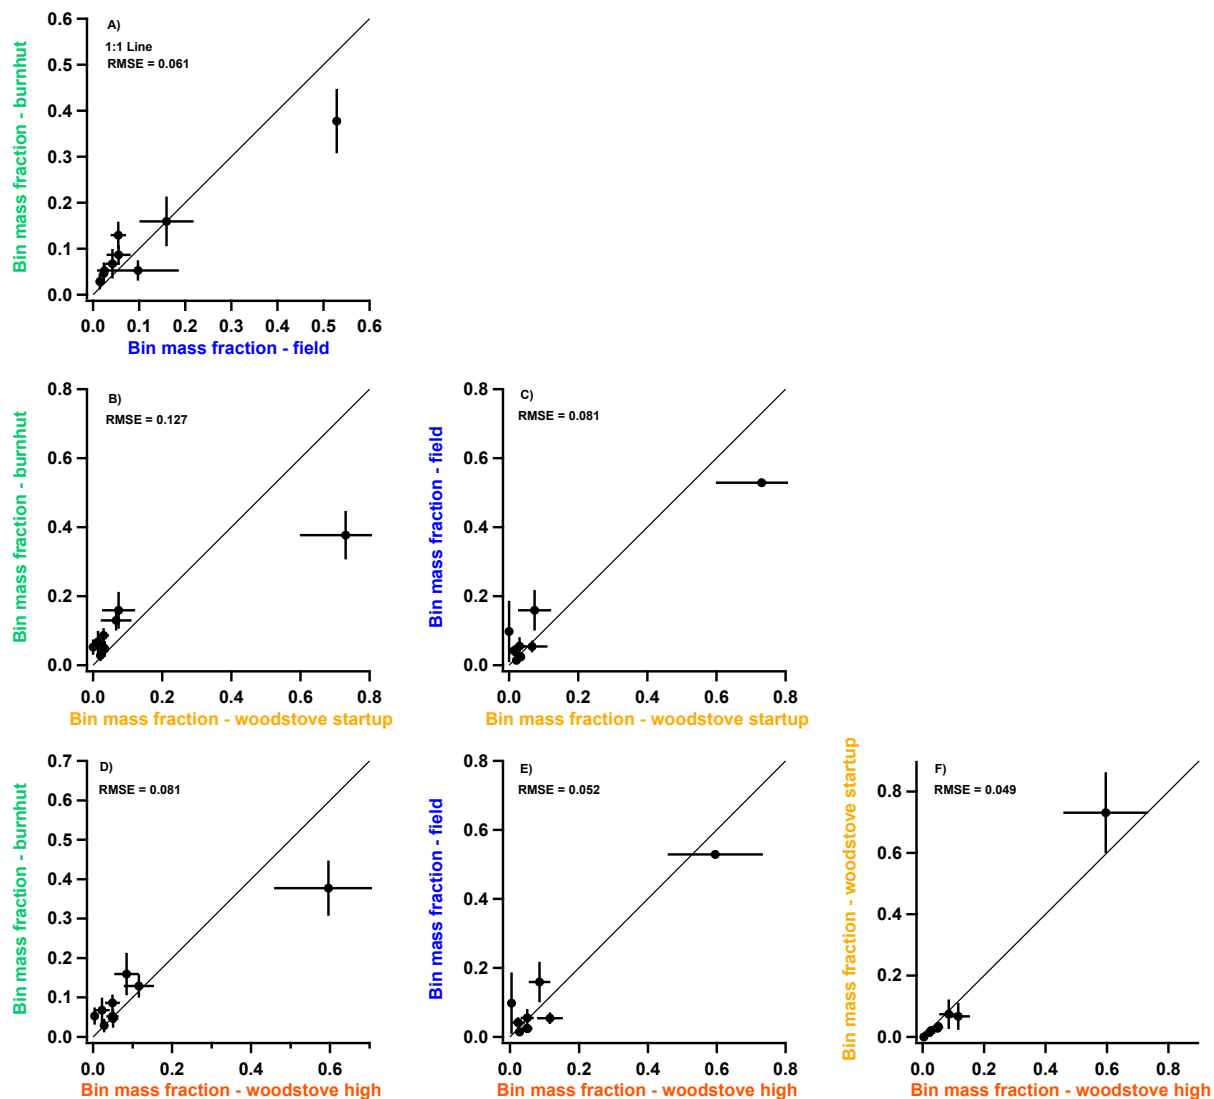

90

91 **Figure S5: Scatter plots of the bin mass fraction contributions from volatility distributions in the**  
 92 **range  $-2 \leq \log C^* \leq 6$  derived from TD/GC/MS chromatograms. The plots presented here include**  
 93 **all combinations of comparisons between burnhut, field, RWC – high and RWC – startup**  
 94 **distributions (delineated by label colors). The markers represent the average bin mass fraction**  
 95 **from replicate (N=3) filter-in-tube samples while the error bars show the standard deviations in the**  
 96 **replicates. The solid black line shows the 1:1 line in each plot with the root mean square error**  
 97 **(RMSE) to the 1:1 line printed in each plot.**

98

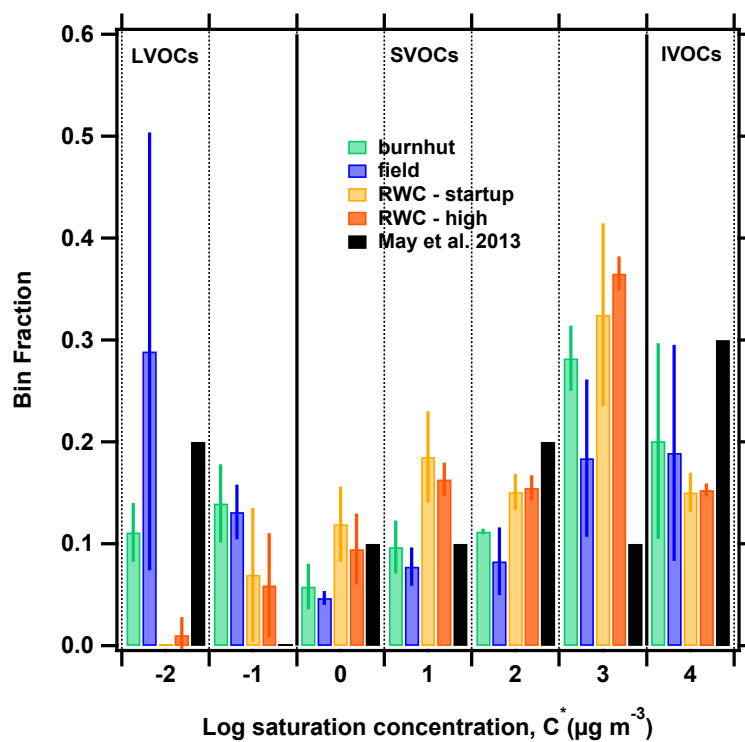

99

100 **Figure S6: Volatility distributions of biomass burning combustion sources - burnhut, field,**  
 101 **woodstove – high fire and woodstove – start up (delineated by color) re-normalized to the range**  
 102  **$-2 \leq \log C^* \leq 4$  to enable comparison with the volatility distributions presented in May et al.<sup>2</sup>**  
 103 **Distributions are presented in terms of mass fraction in each  $\log C^*$  bin. The mass fraction showed**  
 104 **in each bin is the average bin mass from replicate (N=3) samples while the error bars show the**  
 105 **standard deviations in the replicates. The black bars show the distribution from May et al.**

106

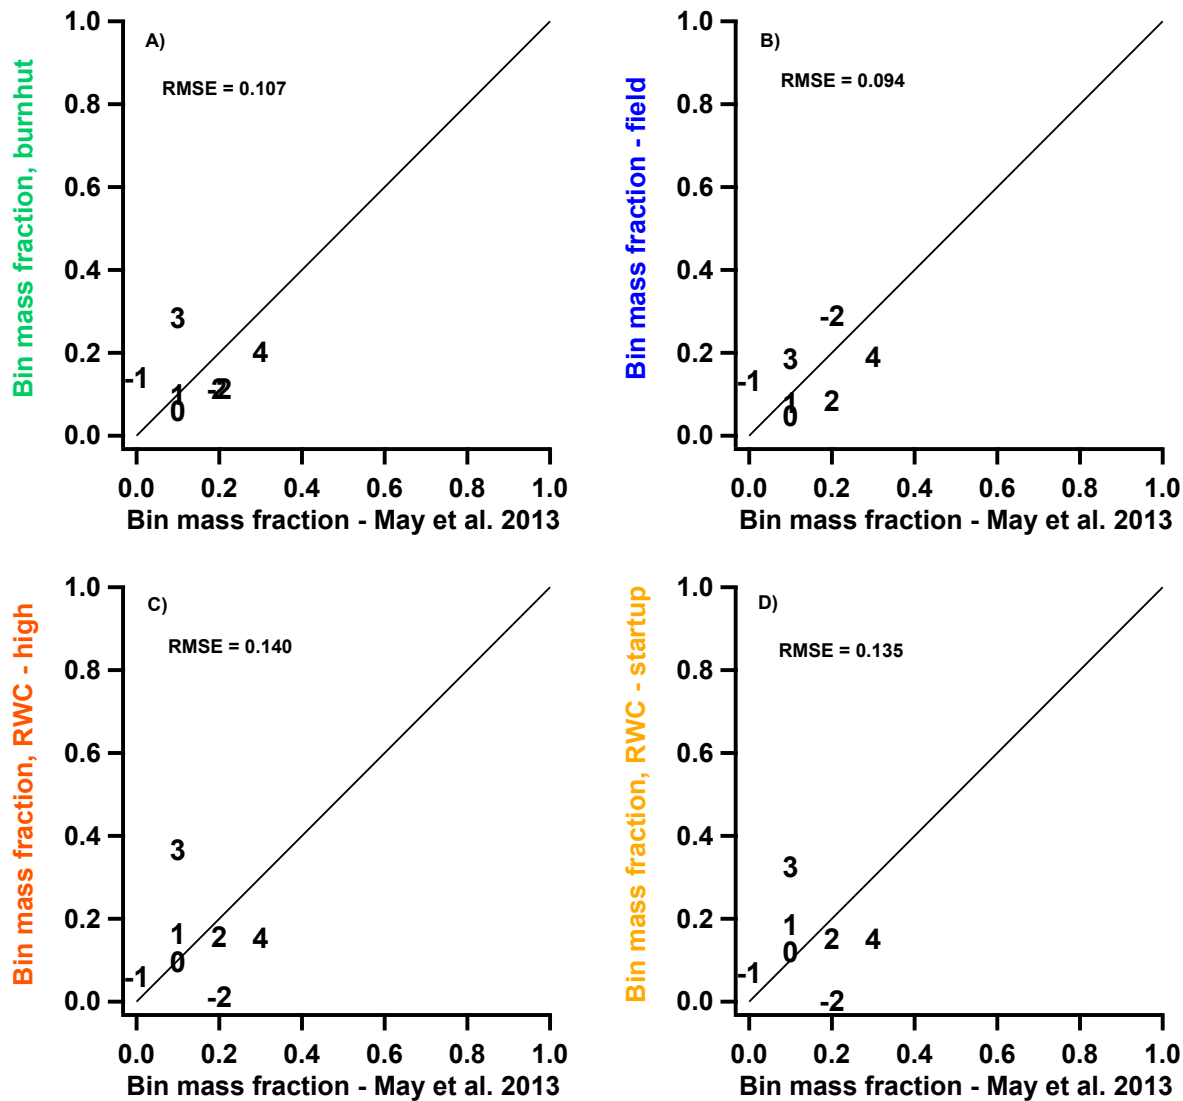

107

108 Figure S7: Scatter plots of the bin mass fraction contributions from volatility distributions re-  
 109 normalized to the range  $-2 \leq \log C^* \leq 4$  to enable comparison with volatility distributions  
 110 presented in the literature.<sup>2</sup> The plots presented here compare re-normalized burnhut, field, RWC  
 111 – high and RWC – startup distributions to May et al. (delineated by label colors). The markers  
 112 represent the average bin mass fraction from replicate (N=3) filter-in-tube samples. The solid black  
 113 line shows the 1:1 line in each plot with the root mean square error (RMSE) to the 1:1 line printed  
 114 in each plot.

115



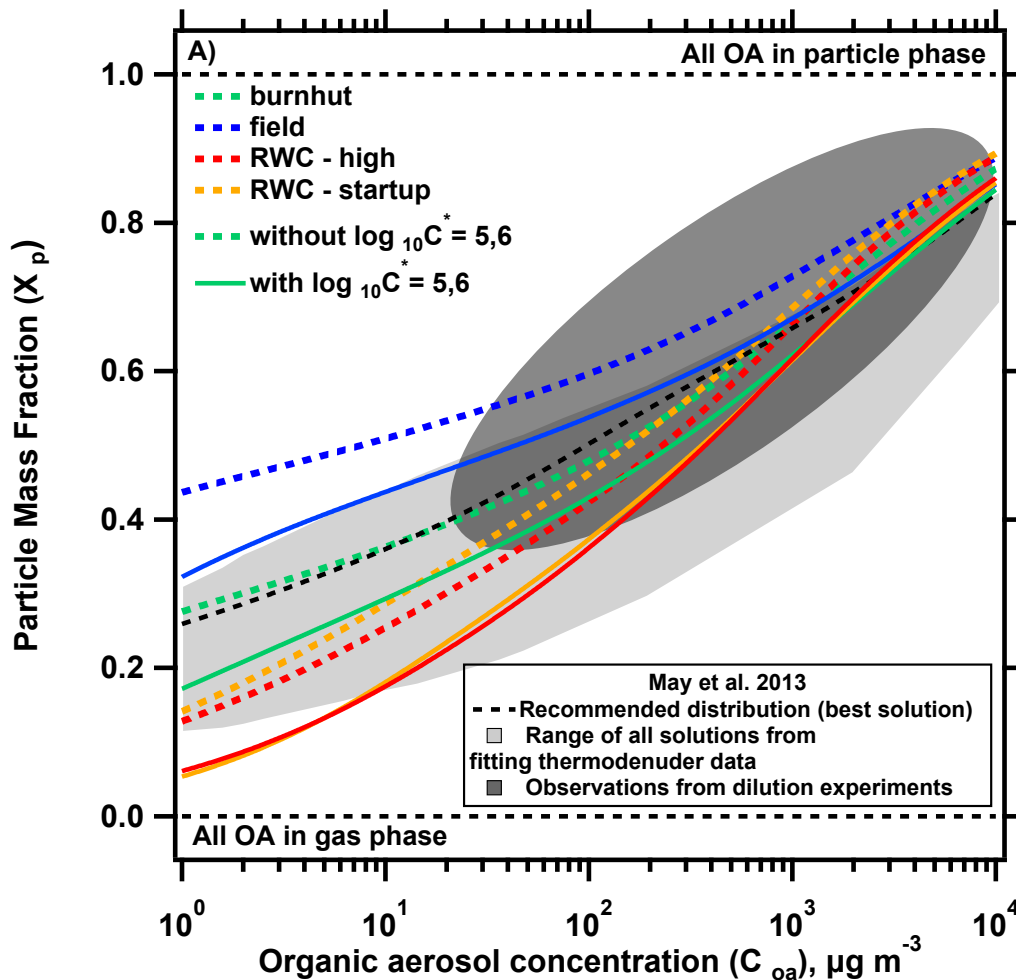

116

117 **Figure S8: Partitioning plot showing the particle mass fraction ( $X_p$ ) calculated using Equation 1 and**  
 118 **volatility distributions shown in Figure 3A (containing bins 5 and 6) indicated by the solid and lines**  
 119 **and Figure S6 (re-normalized after removing bins 5 and 6) indicated by the dashed lines vs organic**  
 120 **aerosol concentration ( $C_{OA}$ ). The biomass burning sources are delineated by color. Also plotted are**  
 121 **observations from May et al.<sup>2</sup> The curves including bins 5 and 6 show the same general trends as**  
 122 **those using renormalized distributions, but are shifted to lower  $X_p$  across the  $C_{OA}$  range, as these**  
 123 **distributions encompass more material. This shift in  $X_p$  is less pronounced at higher  $C_{OA}$  values as**  
 124 **more of the IVOC material partitions into the particle phase under these conditions**

125

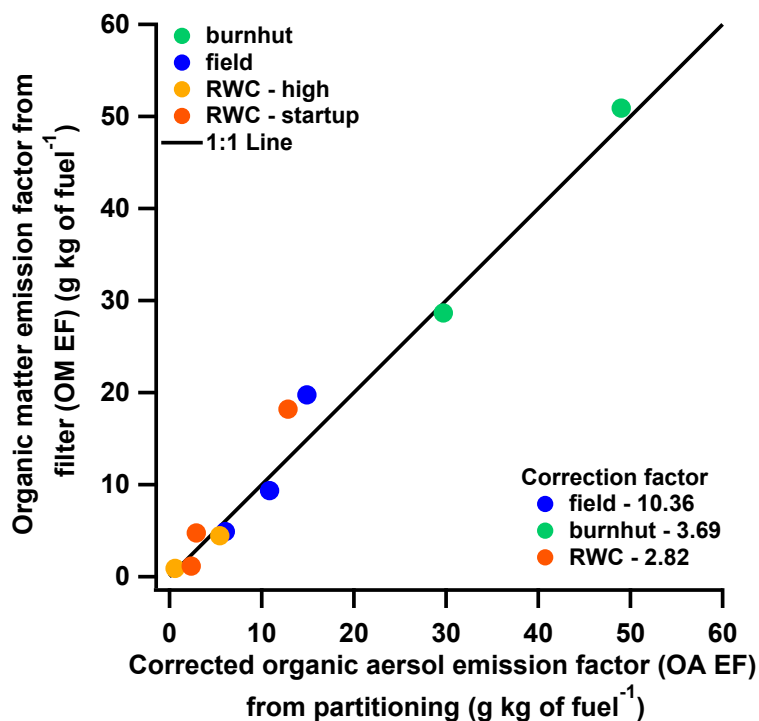

126

127 **Figure S9: Organic matter emission factor (OM EF) as measured via thermo-optical analysis of**  
 128 **quartz filters (converted from OC using a campaign average OM/OC ratio of 1.53) plotted against**  
 129 **organic aerosol emission factor (OA EF) as estimated from particle phase partitioning of total**  
 130 **organic matter measured by filter-in-tube filter+sorbents. Colors delineate biomass burning**  
 131 **combustion source types. The solid black line is the 1:1 line. The correction factors (average of ratio**  
 132 **for each source type) used to reconcile differences between the two EF estimation methods are**  
 133 **printed on the graph for each combustion source type.**

134

### 135 References

- 136 1 E. Grandesso, B. Gullett, A. Touati and D. Tabor, Effect of Moisture, Charge Size, and Chlorine  
 137 Concentration on PCDD/F Emissions from Simulated Open Burning of Forest Biomass, *Environ. Sci.*  
 138 *Technol.*, 2011, **45**, 3887–3894.  
 139 2 A. A. May, E. J. T. Levin, C. J. Hennigan, I. Riipinen, T. Lee, J. L. Collett, J. L. Jimenez, S. M.  
 140 Kreidenweis and A. L. Robinson, Gas-particle partitioning of primary organic aerosol emissions: 3.  
 141 Biomass burning, *J. Geophys. Res. Atmospheres*, 2013, **118**, 11327–11338.  
 142
